# Supplementary material for: Syntheses, structures and luminescence properties of cadmium(II) coordination polymers with in situ formed oxalate and bis(chelating) bridging ligands
Source: Royal Society of Chemistry journal article supplement (doi:10.1039/b807165a), 2008-01-01
Supplement: b807165a.pdf [file b807165a.pdf]

## Supporting Information

### Syntheses, Structures and Luminescence Properties of Cadmium (II) Coordination Polymers with In Situ Formed Oxalate and Bis(chelating) Bridging Ligands

Jian-Yong Zhang, Qi-Yue, Qin-Xiang Jia, Ai-Ling Cheng and En-Qing Gao

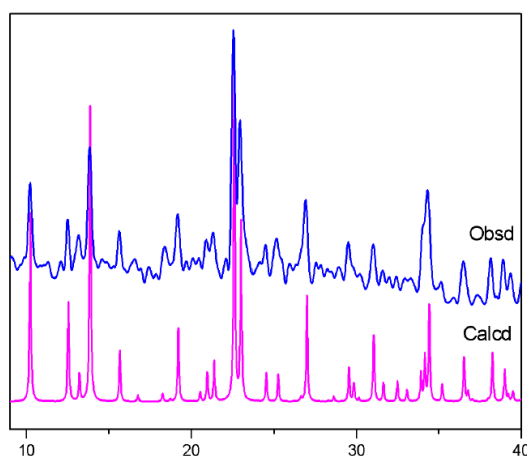

Figure S1. Power X-ray diffraction pattern of the as-synthesized sample of compound **1** and that calculated from single-crystal data.

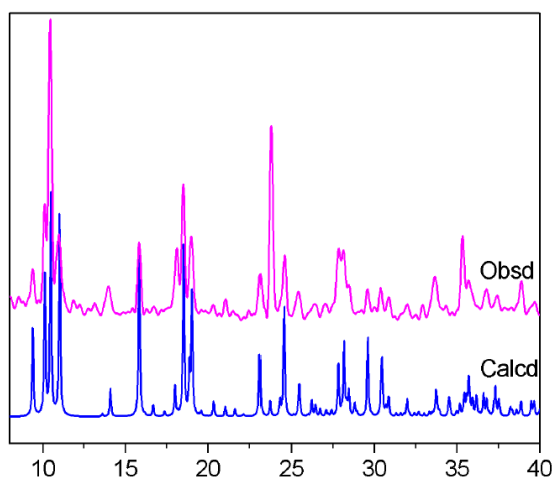

Figure S2. Power X-ray diffraction pattern of the as-synthesized sample of compound **2** and that calculated from single-crystal data.
